# Supplementary material for: Molybdenum disulfide as a highly efficient adsorbent for non-polar gases
Source: Royal Society of Chemistry journal article supplement (doi:10.1039/c5cp00161g), 2015-01-01
Supplement: c5cp00161g1.pdf [file c5cp00161g1.pdf]

# Molybdenum Disulfide as a Highly Efficient Absorbent for Non-polar Gases

Ningning Yu, Lu Wang\*, Min Li, Xiaotian Sun, Tingjun Hou, Youyong Li\*

Functional Nano & Soft Materials Laboratory (FUNSOM), Soochow University, Suzhou, 215123  
Jiangsu, China. Email: lwang22@suda.edu.cn and yyli@suda.edu.cn

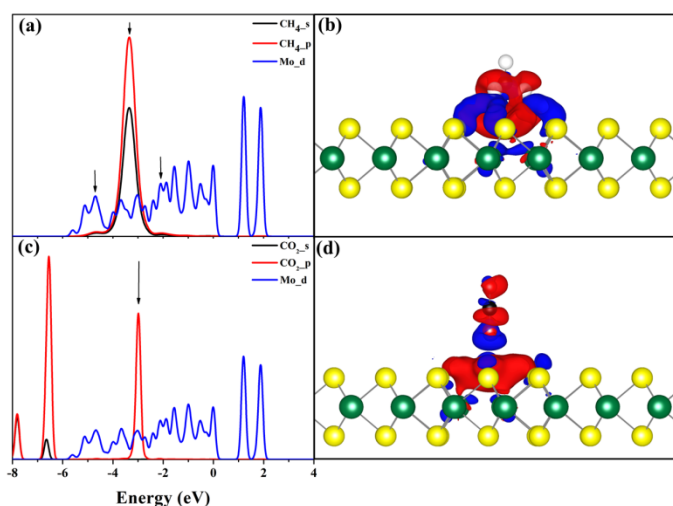

**FIG. S1.** The projected density of states (PDOS) for the  $d$  orbital of Mo and the  $s$  and  $p$  orbitals of (a)  $\text{CH}_4$  and (c)  $\text{CO}_2$ ; (b) and (d) are the deformation density for  $\text{CH}_4$  and  $\text{CO}_2$  adsorbed on  $\text{MoS}_2$  layer with S-DV defect. The increase and decrease of the electron density are colored in red and blue, respectively.

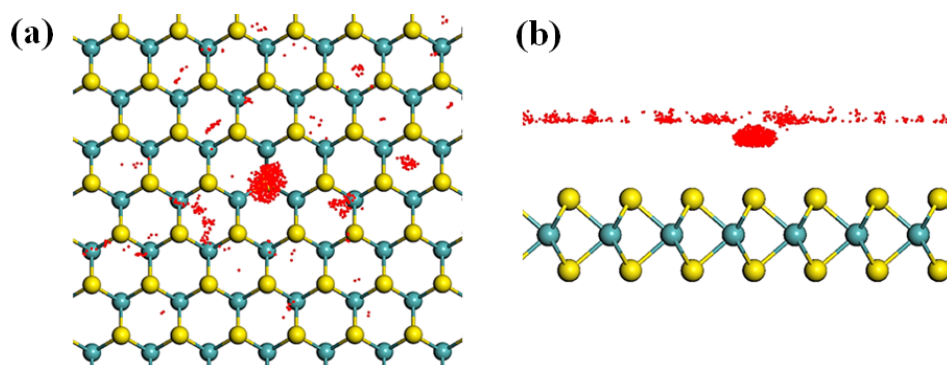

**FIG. S2.** (a) and (b) are the top view and side view of adsorption density distribution for  $\text{CO}_2$  molecules on  $\text{MoS}_2$  with S-SV defect at 80 bar.
